# Supplementary material
Source: PubMed Central journal article supplement (PMC6142201)
Supplement: pnas.1803624115.sapp.pdf [file pnas.1803624115.sapp.pdf]

## PNAS Supporting information for:

Reassessing the chronology of the archaeological site of Anzick

Lorena Becerra-Valdivia, Michael R. Waters, Thomas W. Stafford Jr., Sarah L. Anzick, Daniel Comeskey, Thibaut Devière, Thomas Higham

This PDF includes:

- Table 1. Previously-published radiocarbon dates for osseous material from the site of Anzick
- Table 2.  $\chi^2$  test results on radiocarbon dates obtained for the site of Anzick
- Table 3. Data for four Oxford-obtained paired dates with differing C:N values

**Table 1.** Previously-published radiocarbon dates for osseous material from the site of Anzick, compiled from multiple publications (1–5). Calibration was done using the OxCal 4.3 software (6) and the IntCal13 calibration curve (7).

| Sample number       | Sample name | AMS laboratory number | Chemical fraction dated          | Date (BP)  | cal BP (95.4% confidence range) |
|---------------------|-------------|-----------------------|----------------------------------|------------|---------------------------------|
| SR-8151 (87NBS-280) | Anzick-1    | AA-313A               | decalcified collagen             | 8,690±310  | 10,575-9,005                    |
| SR-8151 (87NBS-280) | Anzick-1    | AA-313B               | untreated gelatin                | 10,500±400 | 12,630-12,140                   |
| SR-8151 (87NBS-280) | Anzick-1    | AA-2978               | aspartic acid                    | 10,240±120 | 12,420-11,400                   |
| SR-8151 (87NBS-280) | Anzick-1    | AA-2979               | glutamic acid                    | 10,820±100 | 12,960-12,565                   |
| SR-8151 (87NBS-280) | Anzick-1    | AA-2980               | hydroxyproline                   | 10,710±100 | 12,775-12,420                   |
| SR-8151 (87NBS-280) | Anzick-1    | AA-2981               | glycine                          | 10,940±90  | 13,020-12,700                   |
| SR-8151 (87NBS-280) | Anzick-1    | AA-2982               | alanine                          | 10,370±130 | 12,625-11,755                   |
| SR-8151 (87NBS-280) | Anzick-1    | CAMS-80535            | decalcified collagen             | 10,580±35  | 12,670-12,425                   |
| SR-8151 (87NBS-280) | Anzick-1    | CAMS-80536            | KOH-collagen                     | 10,525±35  | 12,585-12,400                   |
| SR-8151 (87NBS-280) | Anzick-1    | CAMS-80537            | gelatin                          | 10,610±30  | 12,690-12,540                   |
| SR-8151 (87NBS-280) | Anzick-1    | CAMS-80538            | XAD-purified gelatin hydrolyzate | 10,705±35  | 12,725-12,585                   |
| SR-8151 (87NBS-280) | Anzick-1    | CAMS-35912            | 0.45 $\mu$ m-filtered gelatin    | 11,550±60  | 13,490-13,265                   |
| SR-8151 (87NBS-280) | Anzick-1    | Beta-163833           | alkali collagen                  | 10,780±40  | 12,750-12,655                   |
| SR-8147 (87NBS-281) | Anzick-2    | AA-313C               | decalcified collagen             | 8,620±340  | 10,570-8,770                    |
| SR-8147 (87NBS-281) | Anzick-2    | AA-313D               | untreated gelatin                | 8,940±370  | 11,180-9,145                    |
| SR-8147 (87NBS-281) | Anzick-2    | AA-2973               | aspartic acid                    | 8,510±120  | 9,890-9,140                     |
| SR-8147 (87NBS-281) | Anzick-2    | AA-2974               | glutamic acid                    | 8,740±90   | 10,150-9,540                    |

|                        |            |              |                 |           |               |
|------------------------|------------|--------------|-----------------|-----------|---------------|
| SR-8147<br>(87NBS-281) | Anzick-2   | AA-2975      | hydroxyproline  | 8,520±80  | 9,685-9,320   |
| SR-8147<br>(87NBS-281) | Anzick-2   | AA-2976      | glycine         | 8,680±90  | 10,120-9,490  |
| SR-8147<br>(87NBS-281) | Anzick-2   | AA-2977      | alanine         | 8,590±90  | 9,890-9,430   |
| SR-7599 (rod<br>#122)  | Antler rod | UCIAMS-61661 | XAD-collagen    | 11,025±30 | 13,010-12,775 |
| SR-7599 (rod<br>#122)  | Antler rod | Beta-168967  | alkali collagen | 11,040±40 | 13,040-12,780 |
| Rod #118/11            | Antler rod | Beta-163832  | alkali collagen | 11,040±60 | 13,055-12,750 |

**Table 2.**  $\chi^2$  test results on radiocarbon dates obtained for the site of Anzick through this and previous (1–5; SI Appendix, Table 1) investigations. The statistical analysis was done with OxCal 4.3 (6) following Ward and Wilson (8), using `R_combine` and `Combine` commands (9). `R_combine` performs a  $\chi^2$  test on radiocarbon dates before calibration and was used when comparing multiple dates from a single sample, e.g., Anzick-1. `Combine` performs a  $\chi^2$  test on calibrated dates and was used when different samples were involved, e.g., Anzick-1 and the antler rods. The degrees of freedom are given by *df* and the  $\chi^2$  value calculated by *T*. Noted inside the brackets is the confidence level (at 5%) followed by the critical value of the  $\chi^2$  distribution. This value denotes the level above which *T* should not rise for the dates to be considered in good agreement or comparable.

| Sample number                   | Sample name(s)                                                  | Radiocarbon results included in test (by laboratory number)                                                                                        | Result                     |
|---------------------------------|-----------------------------------------------------------------|----------------------------------------------------------------------------------------------------------------------------------------------------|----------------------------|
| SR-8151                         | Anzick-1                                                        | OxA-35,729; OxA-36,166; OxA-X-2734-18; OxA-X-2739-54                                                                                               | df=3 T=253.013 (5% 7.8)    |
| SR-8151                         | Anzick-1                                                        | OxA-X-2739-54; AA-2979; AA-2981                                                                                                                    | df=2 T=0.939 (5% 5.991)    |
| SR-7599                         | antler rod                                                      | OxA-35,731; OxA-35,732; OxA-X-2734-19; OxA-X-2739-55                                                                                               | df=3 T=11.525 (5% 7.8)     |
| SR-7602                         | antler rod                                                      | OxA-35,733; OxA-35,781; OxA-X-2734-20; OxA-X-2739-56                                                                                               | df=3 T=1.4 (5% 7.8)        |
| SR-7599 & SR-7602               | antler rods                                                     | OxA-35,731; OxA-35,732; OxA-X-2734-19; OxA-X-2739-55; OxA-35,733; OxA-35,781; OxA-X-2734-20; OxA-X-2739-56                                         | df=7 T=12.832 (5% 14.1)    |
| SR-7599 & Rod #118/11           | antler rods                                                     | UCIAMS-61661; Beta-168967; Beta-163832                                                                                                             | df=2 T=0.1 (5% 6.0)        |
| SR-7599, SR-7602, & Rod #118/11 | antler rods                                                     | OxA-35,731; OxA-35,732; OxA-X-2734-19; OxA-X-2739-55; OxA-35,733; OxA-35,781; OxA-X-2734-20; OxA-X-2739-56; UCIAMS-61661; Beta-168967; Beta-163832 | df=10 T=13.618 (5% 18.307) |
| SR-8147                         | Anzick-2                                                        | OxA-35,734; OxA-35,782; OxA-X-2734-21; OxA-X-2739-57                                                                                               | df=3 T=7.982 (5% 7.8)      |
| SR-8147                         | Anzick-2                                                        | OxA-35,734; OxA-35,782; OxA-X-2734-21; OxA-X-2739-57; AA-313C; AA-313D; AA-2973; AA-2974; AA-2975; AA-2976; AA-2977                                | df=10 T=13.988 (5% 18.307) |
| SR-8151 & SR-7599               | Anzick-1 (HYP date, only) and antler rod                        | OxA-X-2739-54; OxA-35,731; OxA-35,732; OxA-X-2734-19; OxA-X-2739-55;                                                                               | df=4 T=11.104 (5% 9.5)     |
| SR-8151 & SR-7602               | Anzick-1 (HYP date, only) and antler rod                        | OxA-X-2739-54; OxA-35,733; OxA-35,781; OxA-X-2734-20; OxA-X-2739-56                                                                                | df=4 T=8.896 (5% 9.5)      |
| SR-8151, SR-7599, & SR-7602     | Anzick-1 (HYP date, only) and two antler rods                   | OxA-X-2739-54; OxA-35,731; OxA-35,732; OxA-X-2734-19; OxA-X-2739-55; OxA-35,733; OxA-35,781; OxA-X-2734-20; OxA-X-2739-56                          | df=8 T=27.422 (5% 15.5)    |
| SR-8151, SR-7599, & SR-7602     | Anzick-1 (HYP date, only) and two antler rods (HYP dates, only) | OxA-X-2739-54; OxA-X-2739-55; OxA-X-2739-56                                                                                                        | df=2 T=3.358 (5% 5.991)    |

**Table 3.** Data for four Oxford-obtained paired dates (two measurements obtained on the same sample) with differing C:N values, prepared using the same pretreatment protocol (P-code) as this study (10). The dates have not been corrected for HPLC background carbon, per Deviese et al. (10). Calibration was done using the OxCal 4.3 software (6) and the IntCal13 calibration curve (7). For the  $\chi^2$  test results, the degrees of freedom are given by df and the  $\chi^2$  value calculated by T. Noted inside the brackets is the confidence level (at 5%) followed by the critical value of the  $\chi^2$  distribution. This value denotes the level above which T should not rise for the dates to be considered in good agreement or comparable. Results show that although C:N values differ for the same sample, radiocarbon dates obtained are not widely disparate from one another.

| Sample number | Sub-sample | P-code       | C:N | Date (BP) | ±  | cal BP (95.4% confidence range) | $\chi^2$ test results |
|---------------|------------|--------------|-----|-----------|----|---------------------------------|-----------------------|
| 1             | a          | NRC-02 (HYP) | 5.2 | 11,360    | 50 | 13,300-13,090                   | df=1 T=5.645 (5%3.8)  |
|               | b          | NRC-02 (HYP) | 4.9 | 11,520    | 45 | 13,455-13,275                   |                       |
| 2             | a          | NRC-02 (HYP) | 5.3 | 11,190    | 50 | 13,160-12,930                   | df=1 T=0.6 (5%3.8)    |
|               | b          | NRC-02 (HYP) | 4.9 | 11,245    | 50 | 13,220-13,025                   |                       |
| 3             | a          | NRC-02 (HYP) | 5.3 | 10,920    | 50 | 12,915-12,700                   | df=1 T=3.1 (5%3.8)    |
|               | b          | NRC-02 (HYP) | 5.0 | 11,045    | 50 | 13,055-12,770                   |                       |
| 4             | a          | NRC-02 (HYP) | 5.7 | 10,915    | 50 | 12,905-12,695                   | df=1 T=10.576 (5%3.8) |
|               | b          | NRC-02 (HYP) | 5.0 | 11,145    | 50 | 13,110-12,850                   |                       |

## References

- Stafford TW, Jull AJT, Brendel K, Duhamel RC, Donahue D (1987) Study of Bone Radiocarbon Dating Accuracy at the University of Arizona NSF Accelerator Facility for Radioisotope Analysis. *Radiocarbon* 29(1):24–44.
- Stafford TW, Hare PE, Currie L, Jull AJT, Donahue DJ (1991) Accelerator radiocarbon dating at the molecular level. *J Archaeol Sci* 18(1):35–72.
- Morrow JE, Fiedel S (2006) New radiocarbon dates for the Clovis component of the Anzick Site, Park County, Montana. *Paleoindian Archaeology: A Hemispheric Perspective*, eds Morrow JE, Gnecco C (University Press of Florida), pp 123–138.
- Waters MR, Stafford TW Jr (2007) Redefining the age of Clovis: implications for the peopling of the Americas. *Science* 315(5815):1122–1126.
- Rasmussen M, et al. (2014) The genome of a Late Pleistocene human from a Clovis burial site in western Montana. *Nature* 506(7487):225–229.
- Ramsey CB (2009) Bayesian Analysis of Radiocarbon Dates. *Radiocarbon* 51(1):337–360.
- Reimer PJ, et al. (2013) IntCal13 and Marine13 Radiocarbon Age Calibration Curves 0–50,000 Years cal BP. *Radiocarbon* 55(4):1869–1887.
- Ward GK, Wilson SR (1978) Procedures for comparing and combining radiocarbon age determinations: a critique. *Archaeometry* 20(1):19–31.
- Ramsey CB (2018) OxCal Analysis. *OxCal 43 Manual*. Available at: [http://c14.arch.ox.ac.uk/oxcalhelp/hlp\\_analysis.html](http://c14.arch.ox.ac.uk/oxcalhelp/hlp_analysis.html) [Accessed April 30, 2018].
- Deviese T, Comeskey D, McCullagh J, Ramsey CB, Higham T (2017) New protocol for compound specific radiocarbon analysis of archaeological bones. *Rapid Commun Mass Spectrom* 32:373–379.
